# Supplementary material for: Physiological substrates and ontogeny-specific expression of the ubiquitin ligases MARCH1 and MARCH8
Source: PubMed Central journal article supplement — Curr Res Immunol. 2021 Oct 15;2:218–28. doi: 10.1016/j.crimmu.2021.10.004 (PMC9040089; doi:10.1016/j.crimmu.2021.10.004), 2021-10-15
Supplement: mmc5.pdf [file mmc5.pdf]

Supplementary Table 5: Significantly up/down-regulated proteins in the PM fraction of *Marchf1<sup>-/-</sup>* cDCs.

| <b>Gene</b>          | <b>Protein Names</b>                                     | <b>Log2 Fold Change</b> | <b>-Log10 p value</b> | <b>Localisation (based on GO-ID of enrichment analysis)</b> | <b>Localisation (based on UniProt)</b>                             |
|----------------------|----------------------------------------------------------|-------------------------|-----------------------|-------------------------------------------------------------|--------------------------------------------------------------------|
| <b><i>C3</i></b>     | Complement C3                                            | 7.04                    | 13.95                 | Extracellular, Cell surface                                 | Extracellular region or secreted                                   |
| <b><i>Cd86</i></b>   | T-lymphocyte activation antigen CD86                     | 6.20                    | 9.76                  | Plasma membrane, Intracellular membrane-bounded organelle   | Cell membrane, Single-pass type I membrane protein                 |
| <b><i>H2-Aa</i></b>  | H-2 class II histocompatibility antigen, A-B alpha chain | 3.51                    | 9.33                  | Plasma membrane, Early endosome                             | Membrane, Single-pass type I membrane protein                      |
| <b><i>H2-Ab1</i></b> | H-2 class II histocompatibility antigen, A beta chain    | 3.68                    | 9.22                  | Plasma membrane, Lysosome                                   | Membrane, Single-pass type I membrane protein                      |
| <b>-</b>             | MLV-related proviral Env polyprotein                     | 1.91                    | 5.85                  | N/A                                                         | Cell membrane, Virion membrane                                     |
| <b><i>Myadm</i></b>  | Myeloid-associated differentiation marker                | 1.29                    | 4.95                  | N/A                                                         | Cortical actin cytoskeleton, Membrane, Multi-pass membrane protein |
| <b><i>Cox7a2</i></b> | Cytochrome c oxidase subunit 7A                          | 3.12                    | 4.06                  | Mitochondrial inner membrane                                | Mitochondrion inner membrane                                       |
| <b><i>Tgm1</i></b>   | Protein-glutamine gamma-glutamyltransferase K            | -3.02                   | 5.77                  | Adherens junction                                           | Membrane, Lipid-anchor                                             |
| <b><i>Itgad</i></b>  | Integrin alpha-D                                         | -2.08                   | 3.47                  | N/A                                                         | Membrane, Single-pass type I membrane protein                      |

Supplementary Table 6: Significantly up/down-regulated proteins in the PM fraction of *Marchf1<sup>-/-</sup>* B cells.

| <b>Gene</b>                | <b>Protein Names</b>                                                  | <b>Log2 Fold Change</b> | <b>-Log10 p value</b> | <b>Localisation (based on GO-ID of enrichment analysis)</b> | <b>Localisation (based on UniProt)</b>              |
|----------------------------|-----------------------------------------------------------------------|-------------------------|-----------------------|-------------------------------------------------------------|-----------------------------------------------------|
| <b>C3</b>                  | Complement C3                                                         | 5.04                    | 8.12                  | Extracellular, Cell surface                                 | Extracellular region or secreted                    |
| -                          | MLV-related proviral Env polyprotein                                  | 2.32                    | 6.99                  | N/A                                                         | Cell membrane, Virion membrane                      |
| <b>Cd86</b>                | T-lymphocyte activation antigen CD86                                  | 3.49                    | 6.18                  | Plasma membrane & intracellular membrane-bounded organelle  | Cell membrane, Single-pass type I membrane protein  |
| <b>H2-Ab1</b>              | H-2 class II histocompatibility antigen, A beta chain                 | 2.07                    | 5.98                  | Plasma membrane, Lysosome                                   | Membrane, Single-pass type I membrane protein       |
| <b>H2-Aa</b>               | H-2 class II histocompatibility antigen, A-B alpha chain              | 1.92                    | 5.64                  | Plasma membrane, Early endosome                             | Membrane, Single-pass type I membrane protein       |
| <b>Stk24; Stk25; Stk26</b> | Serine/threonine-protein kinase 24/25/26                              | 2.13                    | 4.76                  | N/A                                                         | Nucleus                                             |
| <b>Anpep</b>               | Aminopeptidase N                                                      | 2.48                    | 4.42                  | Plasma membrane                                             | Cell membrane, Single-pass type II membrane protein |
| <b>Ahsg</b>                | Alpha-2-HS-glycoprotein                                               | 2.29                    | 4.32                  | N/A                                                         | Secreted                                            |
| <b>Lrch1</b>               | Leucine-rich repeat and calponin homology domain-containing protein 1 | 1.94                    | 4.27                  | N/A                                                         | Cytoplasm                                           |
| <b>Ttc7a</b>               | Tetratricopeptide repeat protein 7A                                   | 1.99                    | 4.25                  | N/A                                                         | Cell membrane, Cytoplasm                            |

|                             |                                                      |      |      |                                                          |                                                           |
|-----------------------------|------------------------------------------------------|------|------|----------------------------------------------------------|-----------------------------------------------------------|
| <b><i>Rpl34</i></b>         | 60S ribosomal protein L34                            | 2.63 | 4.22 | Mitochondrion                                            | Endoplasmic reticulum,<br>Cytosol                         |
| <b><i>Coro2a</i></b>        | Coronin-2A                                           | 1.42 | 4.00 | Brush border                                             | Brush border,<br>Transcription repressor                  |
| <b><i>Sh3kbp1</i></b>       | SH3 domain-containing kinase-binding protein 1       | 2.08 | 3.84 | Cell-cell junction,<br>Endocytic vesicle                 | Cytoskeleton,<br>Cytoplasm                                |
| <b><i>Ifi30</i></b>         | Gamma-interferon-inducible lysosomal thiol reductase | 2.60 | 3.83 | Lysosome                                                 | Lysosome                                                  |
| <b><i>Itgax</i></b>         | Integrin alpha-X                                     | 2.65 | 3.83 | Plasma membrane                                          | Membrane, Single-pass<br>type I membrane protein          |
| <b><i>Hbb-b1;Hbb-b2</i></b> | Hemoglobin subunit beta-1/2                          | 2.11 | 3.68 | Myelin sheath,<br>Haemoglobin complex                    | Cytosol                                                   |
| <b><i>Stk10</i></b>         | Serine/threonine-protein kinase 10                   | 1.63 | 3.58 | N/A                                                      | Cell membrane,<br>Peripheral membrane                     |
| <b><i>Frmd8</i></b>         | FERM domain-containing protein 8                     | 1.56 | 3.55 | N/A                                                      | Cytosol, Cell membrane                                    |
| <b><i>Taok3</i></b>         | Serine/threonine-protein kinase TAO3                 | 1.43 | 3.53 | N/A                                                      | Cytoplasm                                                 |
| <b><i>Git2</i></b>          | ARF GTPase-activating protein GIT2                   | 1.83 | 3.42 | Calyx of Held                                            | Nucleoplasm                                               |
| <b><i>Actr2</i></b>         | Actin-related protein 2                              | 1.18 | 3.36 | Cell cortex, Actin cap                                   | Cytoskeleton, Nucleus                                     |
| <b><i>Ptprj</i></b>         | Receptor-type tyrosine-protein phosphatase eta       | 2.10 | 3.34 | Immunol. synapse,<br>Plasma membrane,<br>Ruffle membrane | Cell membrane, Single-<br>pass type I membrane<br>protein |
| <b><i>Ahrr</i></b>          | Aryl hydrocarbon receptor repressor                  | 2.23 | 3.34 | Nucleus                                                  | Nucleus                                                   |
| <b><i>Fam126a</i></b>       | Hyccin                                               | 1.69 | 3.31 | Neuron projection                                        | Cytosol, Plasma<br>membrane                               |
| <b><i>Stxbp3</i></b>        | Syntaxin-binding protein 3                           | 1.16 | 3.29 | Plasma membrane,<br>Apical plasma<br>Membrane, Cytosol   | Cell membrane, Cytosol                                    |
| <b><i>Gbp5</i></b>          | Guanylate-binding protein 5                          | 1.24 | 3.28 | Cytoplasmic vesicle                                      | Golgi apparatus<br>membrane, Cytoplasm                    |

|                       |                                                                   |      |      |                                                                                                                                  |                                                                                   |
|-----------------------|-------------------------------------------------------------------|------|------|----------------------------------------------------------------------------------------------------------------------------------|-----------------------------------------------------------------------------------|
| <b><i>Stxbp2</i></b>  | Syntaxin-binding protein 2                                        | 1.34 | 3.15 | Apical plasma membrane, Phagocytic vesicle, Zymogen granule membrane                                                             | Cytosol, azurophil granule, apical plasma membrane                                |
| <b><i>Cct8</i></b>    | T-complex protein 1 subunit theta                                 | 2.13 | 3.12 | Cell body, Zona pellucida receptor complex, Chaperonin-containing T-complex                                                      | Cytoskeleton, Cytoplasm                                                           |
| <b><i>Ap1m1</i></b>   | AP-1 complex subunit mu-1                                         | 2.23 | 2.96 | N/A                                                                                                                              | Golgi apparatus, Peripheral membrane protein                                      |
| <b><i>Pacsin2</i></b> | Protein kinase C and casein kinase substrate in neurons protein 2 | 2.72 | 2.90 | Cytoplasm, Cell-cell junction, Cytosol, Trans-Golgi network, Extrinsic component of membrane                                     | Ruffle membrane. Peripheral membrane, Cell membrane, Early endosome, Cytoskeleton |
| <b><i>Iqgap1</i></b>  | Ras GTPase-activating-like protein IQGAP1                         | 1.00 | 2.89 | Nucleus, Cytoplasm, Cell-cell junction, Lateral plasma membrane, Neuron projection, Cell leading edge, Ribonucleoprotein complex | Nucleus, Plasma membrane, Cytoplasm                                               |
| <b><i>Agfg1</i></b>   | Arf-GAP domain and FG repeat-containing protein 1                 | 2.18 | 2.85 | Cytoplasmic vesicle, Neuronal cell body, Cell projection                                                                         | Nucleus, Cytoplasmic vesicle                                                      |
| <b><i>Hba</i></b>     | Hemoglobin subunit alpha                                          | 2.00 | 2.83 | Myelin sheath                                                                                                                    | Cytosol, Extracellular region or secreted, Myelin sheath                          |
| <b><i>Tubgcp3</i></b> | Gamma-tubulin complex component 3                                 | 1.16 | 2.81 | N/A                                                                                                                              | Centrosome                                                                        |
| <b><i>Csk</i></b>     | Tyrosine-protein kinase CSK                                       | 1.16 | 2.77 | Cell-cell junction                                                                                                               | Plasma membrane, Cytoplasm                                                        |

|                      |                                                       |      |      |                                                                                                  |                                                                                     |
|----------------------|-------------------------------------------------------|------|------|--------------------------------------------------------------------------------------------------|-------------------------------------------------------------------------------------|
| <b><i>Ap1b1</i></b>  | AP-1 complex subunit beta-1                           | 2.19 | 2.74 | N/A                                                                                              | Golgi apparatus,<br>Peripheral membrane<br>protein                                  |
| <b><i>Actr3</i></b>  | Actin-related protein 3                               | 1.14 | 2.73 | Lamellipodium, Cell-cell<br>junction, Brush border                                               | Cytoskeleton, Nucleus,<br>Cell projection                                           |
| <b><i>Ablim1</i></b> | Actin-binding LIM protein 1                           | 1.22 | 2.73 | Actin cytoskeleton,<br>Postsynaptic density                                                      | Cytoskeleton,<br>Cytoplasm                                                          |
| <b><i>Ap2s1</i></b>  | AP-2 complex subunit sigma                            | 1.35 | 2.71 | AP-2 adaptor complex                                                                             | Cell membrane,<br>Peripheral membrane<br>protein                                    |
| <b><i>Eps15</i></b>  | Epidermal growth factor receptor substrate<br>15      | 1.79 | 2.68 | Plasma membrane,<br>Clathrin-coated<br>pit/vesicle, Ciliary<br>membrane, AP-2<br>adaptor complex | Cell membrane,<br>Peripheral membrane<br>protein, Cytoplasm,<br>Clathrin-coated pit |
| <b><i>Ccm2</i></b>   | Cerebral cavernous malformations protein<br>2 homolog | 1.43 | 2.66 | Protein-containing<br>complex                                                                    | Cytoplasm                                                                           |
| <b><i>Fam65b</i></b> | Protein FAM65B                                        | 1.70 | 2.60 | Stereocilium                                                                                     | Cytoskeleton,<br>Stereocilium membrane,<br>Apical cell membrane,<br>Cytoplasm       |
| <b><i>Arpc2</i></b>  | Actin-related protein 2/3 complex subunit 2           | 1.02 | 2.53 | Focal adhesion, Plasma<br>membrane, Synapse,<br>Endosome, Cell leading<br>edge,                  | Nucleus, Cytoskeleton,<br>Cell projection                                           |
| <b><i>Anxa6</i></b>  | Annexin A6                                            | 1.99 | 2.52 | Perinuclear region of<br>cytoplasm, Collagen-<br>containing extracellular<br>matrix              | Cytoplasm,<br>Melanosome                                                            |
| <b><i>Mpp6</i></b>   | MAGUK p55 subfamily member 6                          | 1.95 | 2.52 | Plasma membrane                                                                                  | Membrane, Peripheral<br>membrane                                                    |

|                |                                                    |       |      |                                                                     |                                                                                                                                                                                    |
|----------------|----------------------------------------------------|-------|------|---------------------------------------------------------------------|------------------------------------------------------------------------------------------------------------------------------------------------------------------------------------|
| <b>Gbas</b>    | Protein NipSnap homolog 2                          | -3.07 | 4.79 | Cytoplasm,<br>Mitochondrion                                         | Mitochondrion outer<br>membrane, Cytoplasm                                                                                                                                         |
| <b>Slc25a1</b> | Tricarboxylate transport protein,<br>mitochondrial | -2.75 | 3.68 | Mitochondrion.<br>Mitochondrion inner<br>membrane                   | Mitochondrion inner<br>membrane                                                                                                                                                    |
| <b>Sorl1</b>   | Sortilin-related receptor                          | -2.15 | 3.48 | Nuclear envelope lumen                                              | Cell membrane, Single-<br>pass type I membrane<br>protein, Endosome,<br>Secreted, Golgi<br>apparatus membrane,<br>Endoplasmic reticulum<br>membrane, Secretory<br>vesicle membrane |
| -              | Ig lambda-1 chain V region                         | -1.99 | 3.39 | N/A                                                                 | Extracellular space,<br>Plasma membrane                                                                                                                                            |
| <b>Sfxn3</b>   | Sideroflexin-3                                     | -1.38 | 3.08 | Mitochondrion                                                       | Mitochondrion<br>membrane                                                                                                                                                          |
| <b>Lmbrd1</b>  | Probable lysosomal cobalamin transporter           | -2.57 | 3.04 | Plasma membrane,<br>Lysosome, Clathrin-<br>coated endocytic vesicle | Lysosome membrane                                                                                                                                                                  |
| <b>Arl8b</b>   | ADP-ribosylation factor-like protein 8B            | -1.24 | 3.04 | Synapse, Axon                                                       | Late endosome<br>membrane,<br>Cytoskeleton,<br>Lysosome, Axon                                                                                                                      |
| <b>Fundc2</b>  | FUN14 domain-containing protein 2                  | -2.48 | 2.93 | N/A                                                                 | Mitochondrion.<br>Mitochondrion outer<br>membrane                                                                                                                                  |
| <b>Ckap4</b>   | Cytoskeleton-associated protein 4                  | -1.22 | 2.85 | Endoplasmic reticulum                                               | Cytoskeleton,<br>Endoplasmic reticulum<br>membrane, Cell<br>membrane                                                                                                               |
| <b>Mtco1</b>   | Cytochrome c oxidase subunit 1                     | -1.33 | 2.80 | Mitochondrion inner<br>membrane                                     | Mitochondrion inner<br>membrane                                                                                                                                                    |

|                        |                                             |       |      |                                            |                                |
|------------------------|---------------------------------------------|-------|------|--------------------------------------------|--------------------------------|
| <b><i>Hist1h1b</i></b> | Histone H1.5                                | -1.17 | 2.78 | N/A                                        | Nucleus, Chromosome            |
| <b><i>Hccs</i></b>     | Cytochrome c-type heme lyase                | -2.23 | 2.58 | Mitochondrion                              | Mitochondrion inner membrane   |
| <b><i>Mcur1</i></b>    | Mitochondrial calcium uniporter regulator 1 | -1.64 | 2.55 | N/A                                        | Mitochondrion inner membrane   |
| <b><i>Ctss</i></b>     | Cathepsin S                                 | -2.27 | 2.53 | Membrane, Lysosome                         | Secreted, Lysosome             |
| <b><i>Rdh11</i></b>    | Retinol dehydrogenase 11                    | -1.55 | 2.52 | Photoreceptor inner/outer segment membrane | Endoplasmic reticulum membrane |

Supplementary Table 7: Significantly up/down-regulated proteins in the PM fraction of *Marchf8<sup>-/-</sup>* B cells.

| <b>Gene</b>          | <b>Protein Names</b>                  | <b>Log2 Fold Change</b> | <b>-Log10 p value</b> | <b>Localisation (based on GO-ID of enrichment analysis)</b>                                                                                    | <b>Localisation (based on UniProt)</b>                           |
|----------------------|---------------------------------------|-------------------------|-----------------------|------------------------------------------------------------------------------------------------------------------------------------------------|------------------------------------------------------------------|
| <b><i>Msn</i></b>    | Moesin                                | 1.50                    | 15.24                 | Apical plasma membrane, Basolateral plasma membrane, Apical part of cell, Microvillus, Myelin sheath                                           | Cytoskeleton, Plasma membrane, Microvillus                       |
| <b><i>Rdx</i></b>    | Radixin                               | 1.81                    | 10.32                 | Plasma membrane, Lamellipodium, Filopodium, Ruffle, Apical part of cell, Stereocilium, Cortical actin cytoskeleton, Microvillus, Myelin sheath | Cell membrane, Cytoskeleton, Microvillus                         |
| <b><i>Arcn1</i></b>  | Coatomer subunit delta                | 2.82                    | 8.53                  | Golgi apparatus, Endoplasmic reticulum, COPI-coated vesicle                                                                                    | Golgi apparatus membrane, peripheral membrane protein, Cytoplasm |
| <b><i>Ddb1</i></b>   | DNA damage-binding protein 1          | 2.49                    | 6.35                  | N/A                                                                                                                                            | Nucleus, Cytoplasm                                               |
| <b><i>Prpf19</i></b> | Pre-mRNA-processing factor 19         | 2.17                    | 5.80                  | Nucleus                                                                                                                                        | Nucleus, Nucleoplasm, Spindle                                    |
| <b><i>Srrt</i></b>   | Serrate RNA effector molecule homolog | 2.39                    | 5.38                  | Cytoplasm, Nucleoplasm                                                                                                                         | Cytoplasm, Nucleoplasm                                           |



|                           |                                                        |      |      |                                                                                                                                                                                                                                   |                                                     |
|---------------------------|--------------------------------------------------------|------|------|-----------------------------------------------------------------------------------------------------------------------------------------------------------------------------------------------------------------------------------|-----------------------------------------------------|
| <b><i>Cd1d1;Cd1d2</i></b> | Antigen-presenting glycoprotein CD1d1/2                | 1.13 | 5.38 | External side of plasma membrane, Endosome, Lysosome                                                                                                                                                                              | Cell membrane, Endosome, Lysosome                   |
| <b><i>Rqcd1</i></b>       | Cell differentiation protein RCD1 homolog              | 1.46 | 4.86 | P-body                                                                                                                                                                                                                            | Nucleus, P-body                                     |
| <b><i>Gk</i></b>          | Glycerol kinase                                        | 1.61 | 4.02 | Mitochondrion                                                                                                                                                                                                                     | Mitochondrion out membrane                          |
| <b><i>Lamp1</i></b>       | Lysosome-associated membrane glycoprotein 1            | 1.99 | 3.98 | External side of plasma membrane, sarcolemma, cell surface, endosome, endosome, lysosome, phagocytic vesicle, cytolytic granule, synaptic vesicle, vesicle, multivesicular body, melanosome, autolysosome, phagolysosome membrane | Endosome membrane, Lysosome membrane, Cell membrane |
| <b><i>Psma4</i></b>       | Proteasome subunit alpha type-4                        | 2.79 | 3.82 | P-body, Proteasome core complex                                                                                                                                                                                                   | Nucleus, Cytoplasm                                  |
| <b><i>Ubtf</i></b>        | Nucleolar transcription factor 1                       | 1.80 | 3.82 | Nucleolus                                                                                                                                                                                                                         | Nucleus                                             |
| <b><i>Kars</i></b>        | Lysine-tRNA ligase                                     | 1.72 | 3.80 | Mitochondrion, Aminoacyl-tRNA synthetase multienzyme complex                                                                                                                                                                      | Mitochondrion, Cytoplasm, Nucleus, Plasma membrane  |
| <b><i>Pip4k2a</i></b>     | Phosphatidylinositol 5-phosphate 4-kinase type-2 alpha | 1.76 | 3.73 | N/A                                                                                                                                                                                                                               | Nucleus, Plasma membrane                            |
| <b><i>Kpnb1</i></b>       | Importin subunit beta-1                                | 1.50 | 3.42 | Protein-containing complex, Cytoplasmic stress granule                                                                                                                                                                            | Nucleus, Cytoplasm                                  |

|                           |                                                                                |      |      |                                                                                   |                                                          |
|---------------------------|--------------------------------------------------------------------------------|------|------|-----------------------------------------------------------------------------------|----------------------------------------------------------|
| <b><i>Tcp1</i></b>        | T-complex protein 1 subunit alpha                                              | 1.98 | 3.39 | Golgi apparatus,<br>Microtubule organizing<br>center, Myelin sheath,<br>Cell body | Cytoskeleton, Cytosol,<br>Golgi apparatus                |
| <b><i>Khdrbs1</i></b>     | KH domain-containing, RNA-binding,<br>signal transduction-associated protein 1 | 2.57 | 3.33 | Nucleus                                                                           | Nucleus, Cytoplasm                                       |
| <b><i>Copz1</i></b>       | Coatomer subunit zeta-1                                                        | 1.79 | 3.32 | N/A                                                                               | Golgi apparatus,<br>Cytoplasm                            |
| <b><i>Slc25a46</i></b>    | Solute carrier family 25 member 46                                             | 3.06 | 3.32 | Mitochondrion,<br>Mitochondrial outer<br>membrane                                 | Mitochondrial outer<br>membrane                          |
| <b><i>Actr1a</i></b>      | Alpha-centractin                                                               | 1.86 | 3.23 | Myelin sheath                                                                     | Cytoskeleton,<br>Centrosome                              |
| <b><i>Diablo</i></b>      | Diablo homolog, mitochondrial                                                  | 1.85 | 3.10 | Cytoplasm,<br>Mitochondrion,<br>Cytoplasmic side of<br>plasma membrane,           | Mitochondrion                                            |
| <b><i>Frg1</i></b>        | Protein FRG1                                                                   | 1.99 | 3.01 | N/A                                                                               | Cajal body, Nucleolus                                    |
| <b><i>Psm2</i></b>        | 26S proteasome non-ATPase regulatory<br>subunit 2                              | 1.99 | 2.97 | Proteasome accessory<br>complex, Proteasome<br>complex                            | Cytoplasm,<br>Proteasome accessory<br>complex,           |
| <b><i>H2afv;H2afz</i></b> | Histone H2A.V; Histone H2A.Z                                                   | 1.15 | 2.87 | Nucleus                                                                           | Nucleus                                                  |
| <b><i>Fam3a</i></b>       | Protein FAM3A                                                                  | 1.83 | 2.80 | N/A                                                                               | Secreted                                                 |
| <b><i>Cd6</i></b>         | T-cell differentiation antigen CD6                                             | 1.61 | 2.80 | N/A                                                                               | Cell membrane,<br>Single-pass type I<br>membrane protein |
| <b><i>Srsf7</i></b>       | Serine/arginine-rich splicing factor 7                                         | 2.33 | 2.79 | N/A                                                                               | Nucleus, Cytoplasm                                       |
| <b><i>Psm11</i></b>       | 26S proteasome non-ATPase regulatory<br>subunit 11                             | 1.27 | 2.72 | Proteasome accessory<br>complex                                                   | Proteasome accessory<br>complex                          |
| <b><i>Arhgef6</i></b>     | Rho guanine nucleotide exchange factor 6                                       | 1.59 | 2.71 | Lamellipodium, Cell-<br>cell junction                                             | Lamellipodium                                            |

|                       |                                                                |       |      |                                                                        |                                                                      |
|-----------------------|----------------------------------------------------------------|-------|------|------------------------------------------------------------------------|----------------------------------------------------------------------|
| <b><i>Spcs1</i></b>   | Signal peptidase complex subunit 1                             | 2.75  | 2.69 | N/A                                                                    | Microsome membrane,<br>Multi-pass membrane,<br>Endoplasmic reticulum |
| <b><i>Eif5a</i></b>   | Eukaryotic translation initiation factor 5A-1                  | 1.81  | 2.66 | Nucleus, Cytoplasm                                                     | Endoplasmic<br>reticulum, Nucleus                                    |
| <b><i>Golga2</i></b>  | Golgin subfamily A member 2                                    | 1.29  | 2.63 | Golgi apparatus, Golgi<br>membrane, Spindle<br>pole, cis-Golgi network | Golgi apparatus,<br>Spindle pole                                     |
| <b><i>Rpl37a</i></b>  | 60S ribosomal protein L37a                                     | 1.15  | 2.57 | N/A                                                                    | Cytosol, Large<br>ribosomal subunit                                  |
| <b><i>Hexa</i></b>    | Beta-hexosaminidase subunit alpha                              | 1.14  | 2.56 | Membrane, Lysosome                                                     | Lysosome                                                             |
| <b><i>Pgd</i></b>     | 6-phosphogluconate dehydrogenase,<br>decarboxylating           | 1.44  | 2.55 | N/A                                                                    | Golgi apparatus,<br>Endoplasmic<br>reticulum, Nucleus,<br>Secreted   |
| <b><i>Erap1</i></b>   | Endoplasmic reticulum aminopeptidase 1                         | 1.09  | 2.52 | Cytoplasm                                                              | Endoplasmic<br>reticulum, Single-pass<br>type II membrane<br>protein |
| <b><i>Pspc1</i></b>   | Paraspeckle component 1                                        | 1.21  | 2.50 | Nucleoplasm,<br>Paraspeckles                                           | Nucleolus                                                            |
| <b><i>Prpsap1</i></b> | Phosphoribosyl pyrophosphate synthase-<br>associated protein 1 | 1.74  | 2.49 | N/A                                                                    | Cytoplasm                                                            |
| <b><i>Cd247</i></b>   | T-cell surface glycoprotein CD3 zeta chain                     | 1.30  | 2.41 | Alpha-beta T cell<br>receptor complex                                  | Cell membrane,<br>Single-pass type I<br>membrane protein             |
| <b><i>Dek</i></b>     | Protein DEK                                                    | 1.22  | 2.38 | Nucleus, Contractile<br>fiber                                          | Nucleus                                                              |
| <b>-</b>              | Ig lambda-1 chain C region                                     | -1.07 | 6.86 |                                                                        |                                                                      |
| <b><i>Ndufs5</i></b>  | NADH dehydrogenase [ubiquinone] iron-<br>sulfur protein 5      | -1.07 | 6.31 | Mitochondrion                                                          | Mitochondrial inner<br>membrane                                      |

|                |                                                                    |       |      |                                                                      |                                                           |
|----------------|--------------------------------------------------------------------|-------|------|----------------------------------------------------------------------|-----------------------------------------------------------|
| <b>Rab35</b>   | Ras-related protein Rab-35                                         | -1.16 | 5.48 | Mitochondrion                                                        | Endosome, Plasma membrane                                 |
| <b>Atp5j</b>   | ATP synthase-coupling factor 6, mitochondrial                      | -1.29 | 5.03 | Mitochondrion, Mitochondrial inner membrane                          | Mitochondrial inner membrane                              |
| <b>Gnai3</b>   | Guanine nucleotide-binding protein G(k) subunit alpha              | -1.02 | 4.49 | Cytoplasm, Golgi apparatus                                           | Centrosome, Plasma membrane                               |
| <b>Gngt2</b>   | Guanine nucleotide-binding protein G(I)/G(S)/G(O) subunit gamma-T2 | -2.27 | 4.34 | N/A                                                                  | Plasma membrane                                           |
| <b>Gm10881</b> | Ig kappa chain V-V region L7                                       | -1.72 | 3.67 | N/A                                                                  | Secreted                                                  |
| <b>Cldnd1</b>  | Claudin domain-containing protein 1                                | -1.76 | 3.64 | Apical plasma membrane                                               | Multi-pass membrane protein                               |
| -              | Ig kappa chain C region                                            | -1.11 | 3.43 |                                                                      |                                                           |
| <b>Fcer2</b>   | Low affinity immunoglobulin epsilon Fc receptor                    | -1.11 | 3.19 | External side of plasma membrane                                     | Cell membrane, Single-pass type I membrane protein        |
| <b>Pon2</b>    | Serum paraoxonase/arylesterase 2                                   | -1.42 | 3.06 | N/A                                                                  | Membrane                                                  |
| <b>Ube2g2</b>  | Ubiquitin-conjugating enzyme E2 G2                                 | -1.57 | 3.02 | Cytosol, Endoplasmic reticulum                                       | Cytosol, Endoplasmic reticulum                            |
| -              | Ig kappa chain V-V region MOPC 149                                 | -2.25 | 2.58 |                                                                      |                                                           |
| -              | Ig kappa chain V-III region ABPC 22/PC 9245/4050 region MOPC 63    | -1.53 | 2.46 |                                                                      |                                                           |
| <b>Syngt2</b>  | Synaptogyrin-2                                                     | -2.90 | 2.44 | Synaptic vesicle                                                     | Cytoplasmic vesicle membrane, Multi-pass membrane protein |
| <b>Puf60</b>   | Poly(U)-binding-splicing factor PUF60                              | -2.00 | 2.41 | N/A                                                                  | Nucleus                                                   |
| <b>Slc4a1</b>  | Band 3 anion transport protein                                     | -1.34 | 2.39 | Plasma membrane, basolateral plasma membrane, cortical cytoskeleton, | Cell membrane, Multi-pass membrane protein                |

|  |  |  |  |                                        |  |
|--|--|--|--|----------------------------------------|--|
|  |  |  |  | cytoplasmic side of<br>plasma membrane |  |
|--|--|--|--|----------------------------------------|--|
